# Supplementary material for: Chemistry of magnesium alkyls supported by 1,5,9-trimesityldipyrromethene and 2-[(2,6-diisopropylphenyl)amino]-4-[(2,6-diisopropylphenyl)imino]pent-2-ene. A comparative study
Source: Royal Society of Chemistry journal article supplement (doi:10.1039/c2sc21017g), 2012-01-01
Supplement: c2sc21017g.pdf [file c2sc21017g.pdf]

## Supporting Information:

Some Chemistry of Magnesium Alkyls Supported by 1,5,9-trimesityldipyrromethene and 2-[(2,6-diisopropylphenyl)amino]-4-[(2,6-diisopropylphenyl)imino]pent-2-ene. A Comparative Study.

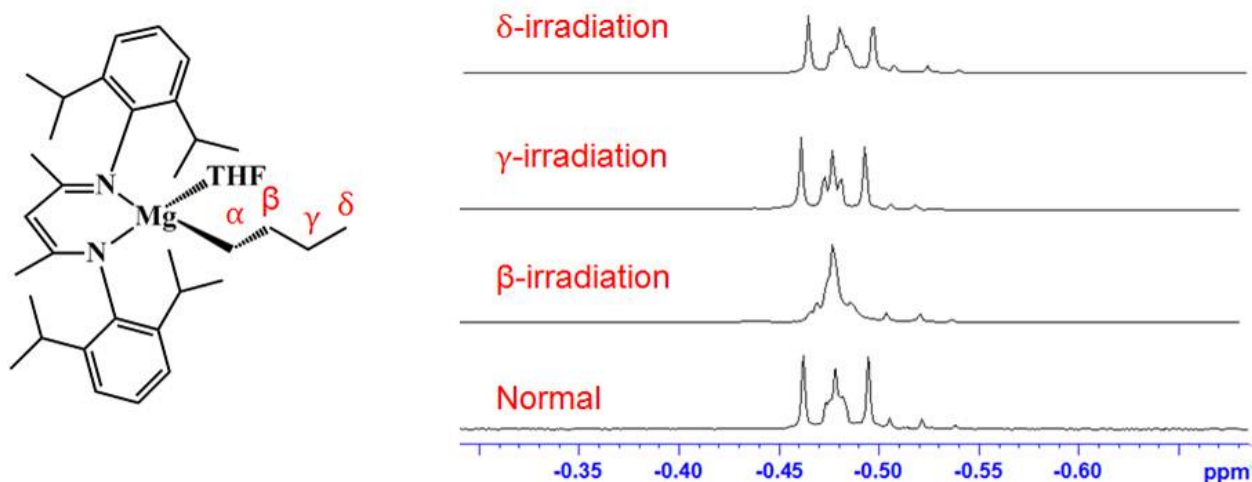

**SI 1.** Homodecoupled  $^1H$  NMR spectra of the  $\alpha$ -CH<sub>2</sub> protons in  $L'MgBu''(THF)$  recorded in toluene- $d_8$  solution.

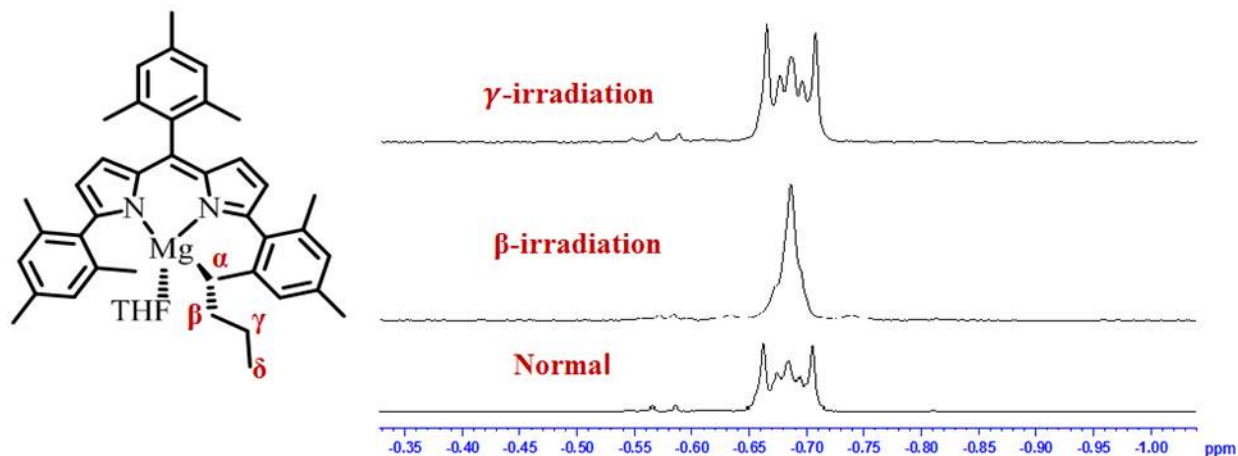

**SI 2.** Homodecoupled  $^1H$  NMR spectra of the  $\alpha$ -CH<sub>2</sub> protons in  $LMgBu''(THF)$  recorded in  $C_6D_6$  solution.

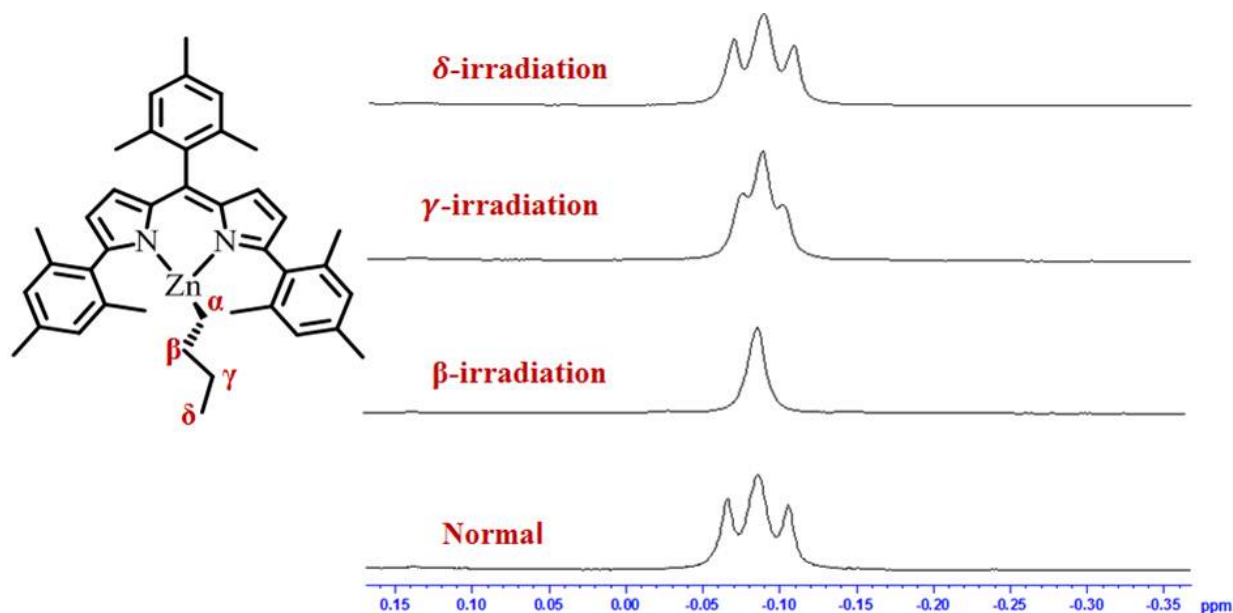

SI 3. Homodecoupled  $^1\text{H}$  NMR spectra of the  $\alpha\text{-CH}_2$  protons in  $\text{LZnBu}''$  recorded in  $\text{C}_6\text{D}_6$  solution.

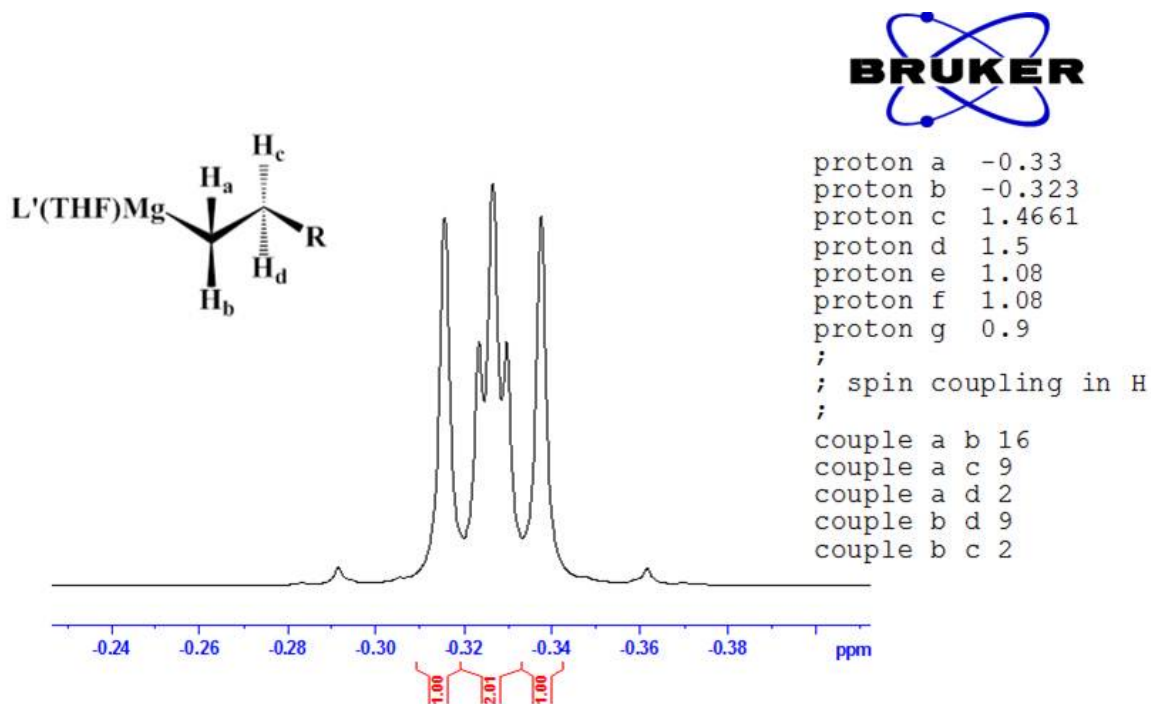

SI 4: The simulation of  $\alpha\text{-CH}_2$  of  $\delta$ -decoupling  $\text{L}'\text{MgBu}''(\text{THF})$  AA'XX' Spin System

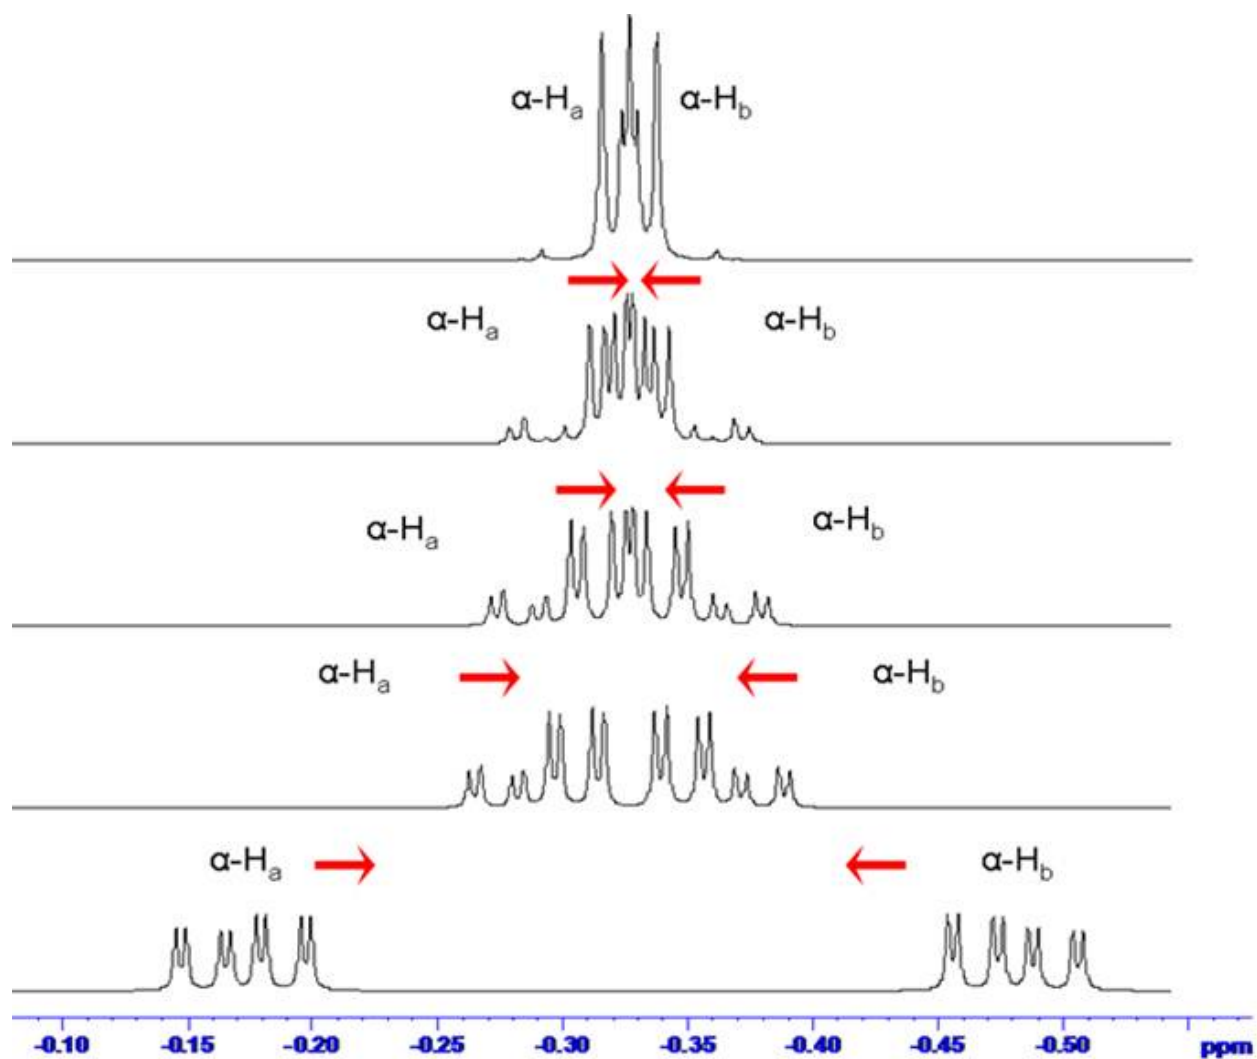

**SI 5:** The simulated patterns of  $\alpha\text{-H}_a$  and  $\alpha\text{-H}_b$  with difference chemical shifts (from ABXY to AA'XX') by TOPSPIN program.

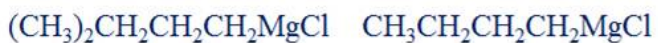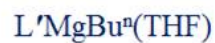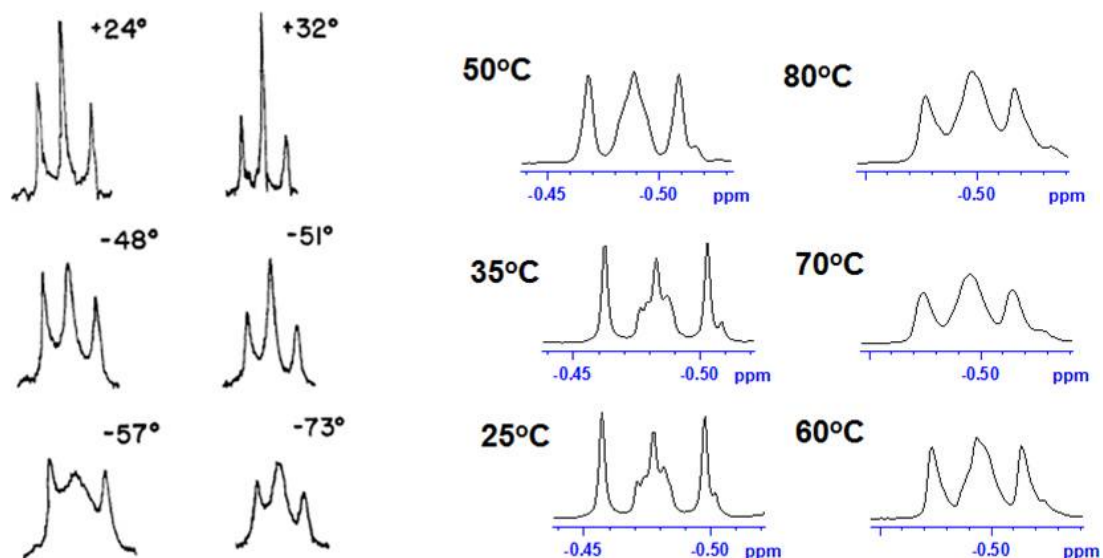

**SI 6:** V.T.  $^1\text{H}$  NMR of  $\alpha\text{-CH}_2$  for the Grignard reagent  $\text{Bu}^n\text{MgBr}$  and 3-Me-BuMgCl in diethyl ether solution vs  $\text{L}^*\text{MgBu}^n(\text{THF})$  in toluene- $\text{d}_8$  solution. (**G. M. Whitesides and J. D. Roberts, *J. Am. Chem. Soc.*, 87, 4878 (1965)**)

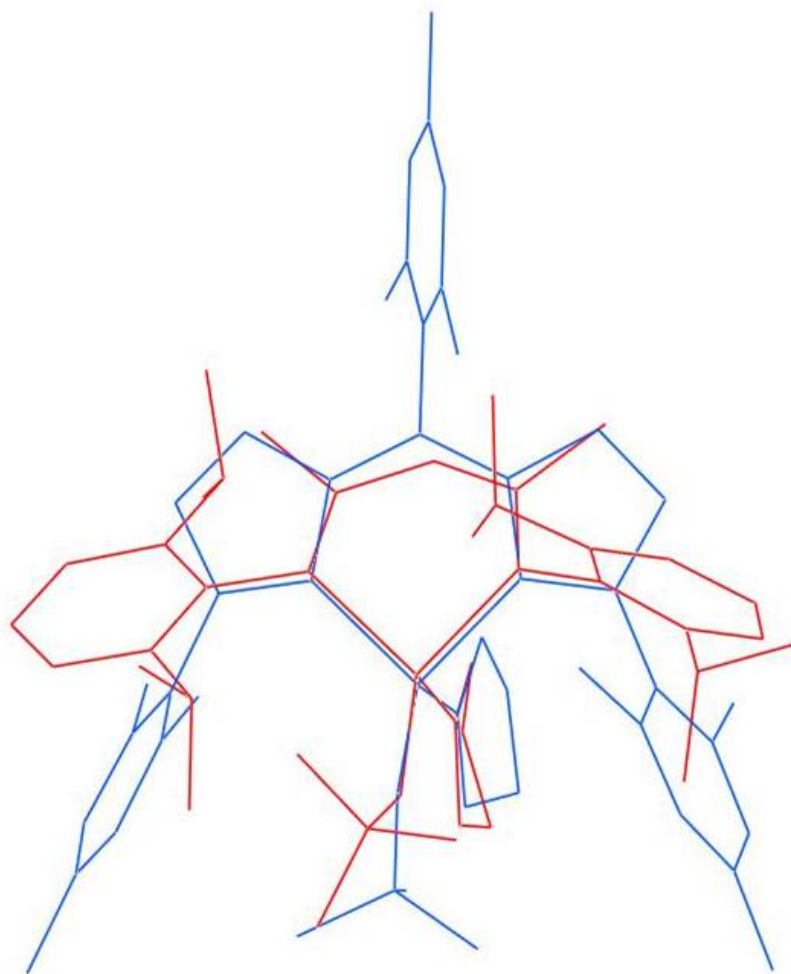

**SI 7:** Best superposition of the molecular structures of  $\text{LMgOBu}^i(\text{THF})$  and  $\text{L}'\text{MgOBu}^l(\text{THF})$  showing the relative disposition of the aryl ligands and the greater steric pressure of mesityl groups in the pyrromethene ligand on the pocket of the *n*-butyl group.

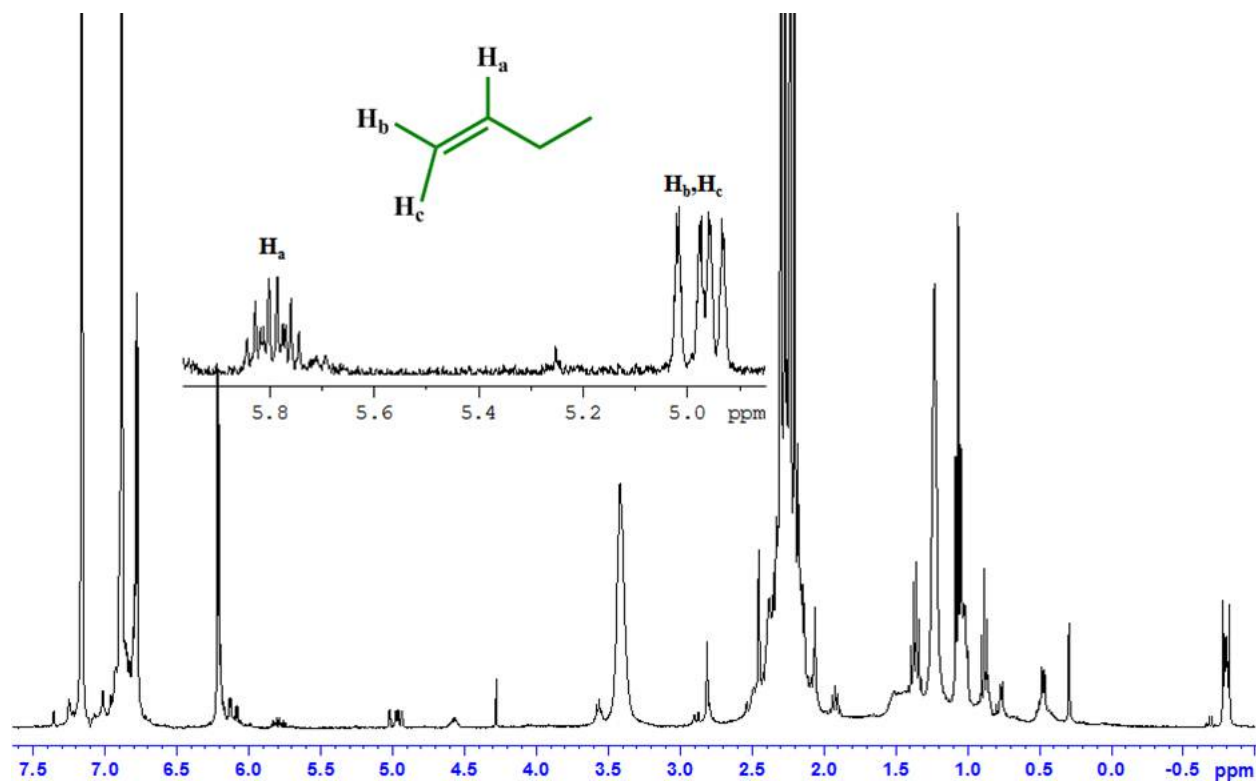

**SI 8.** The reaction of 1:1  $L\text{-LA}:\text{LMgBu}^n(\text{THF})$  in  $\text{C}_6\text{D}_6$  showing the formation of the  $^1\text{H}$  NMR resonances of 1-butene.

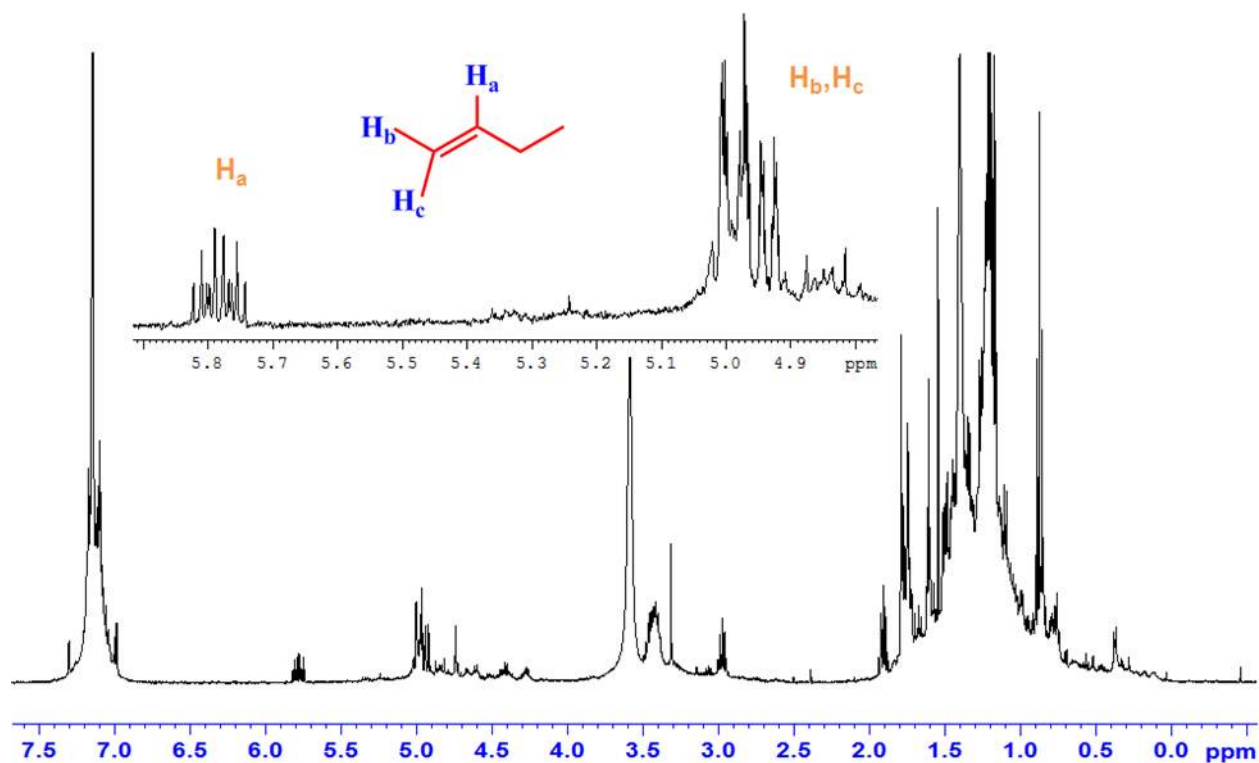

**SI 9:** The reaction of 1:1 *L*-LA:  $\text{L}'\text{MgBu}^n(\text{THF})$  in  $\text{C}_6\text{D}_6$  showing the formation of the  $^1\text{H}$  NMR resonances of 1-butene.

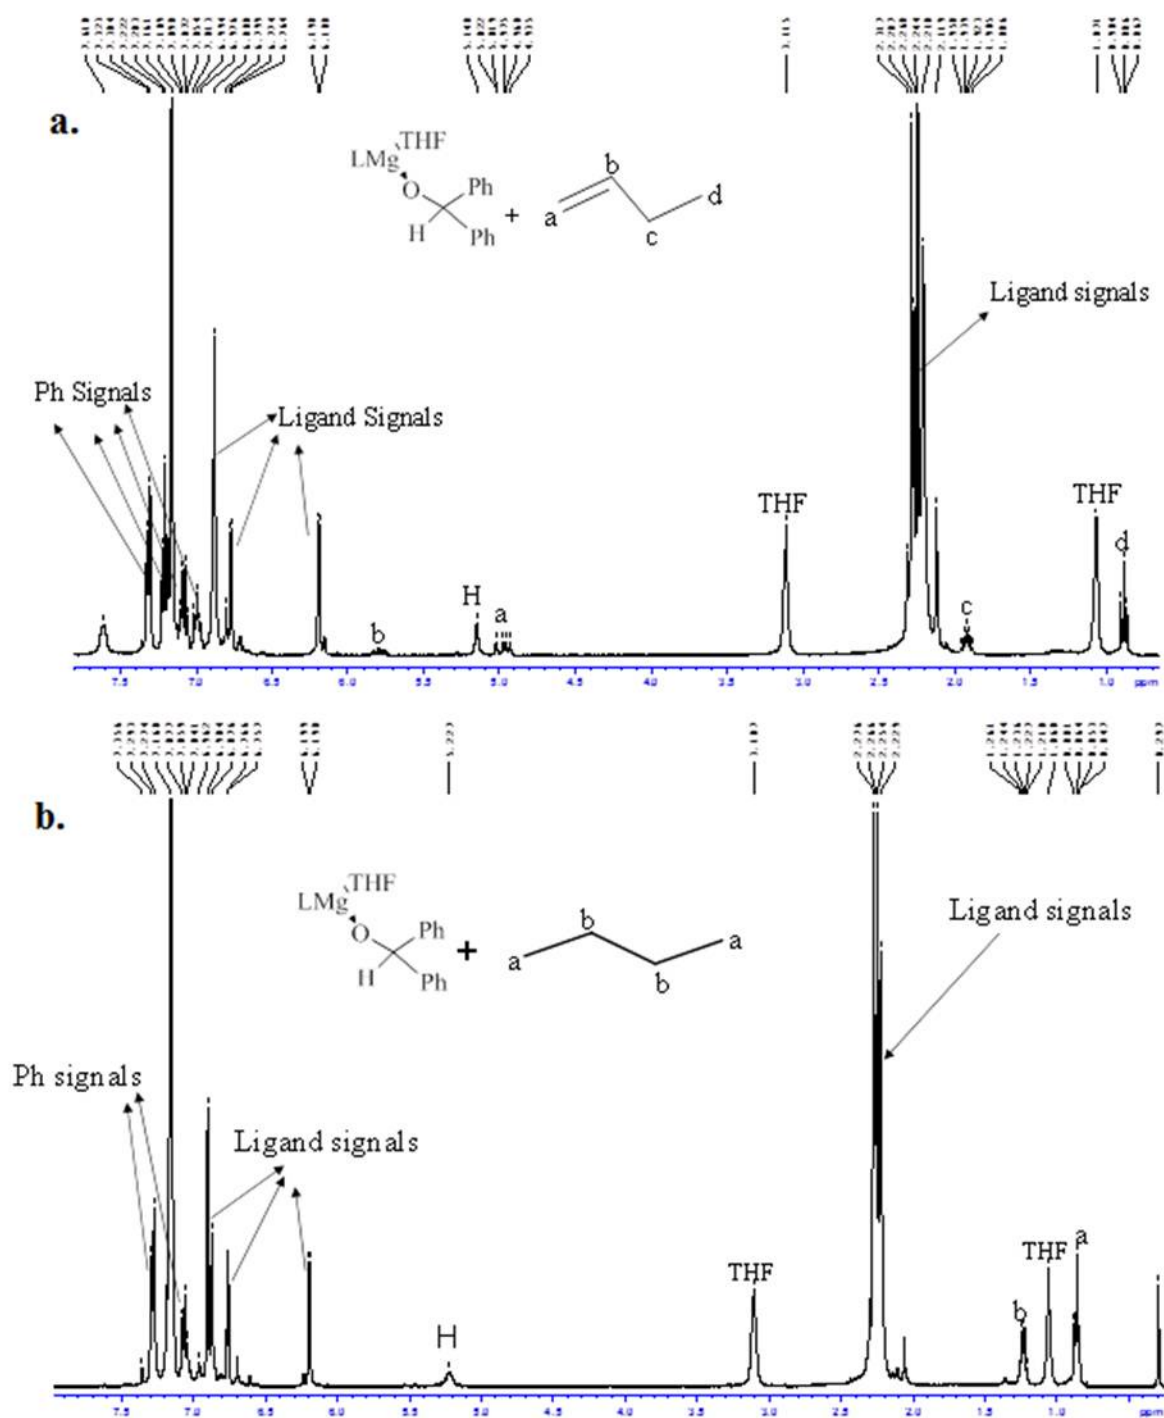

**SI 10:** a.)  $^1\text{H}$  NMR spectrum of the reaction between 1:1 of  $\text{Ph}_2\text{CO}$ :  $\text{LMgBu}^n(\text{THF})$  in  $\text{C}_6\text{D}_6$  showing the formation of 1-butene and the alkoxide ligand  $\text{OCHPh}_2$  b.)  $^1\text{H}$  NMR spectrum of the reaction between 1:1 of  $\text{Ph}_2\text{CHOH}$ :  $\text{LMgBu}^n(\text{THF})$  in  $\text{C}_6\text{D}_6$  showing the formation of butane and the alkoxide ligand  $\text{OCHPh}_2$ .



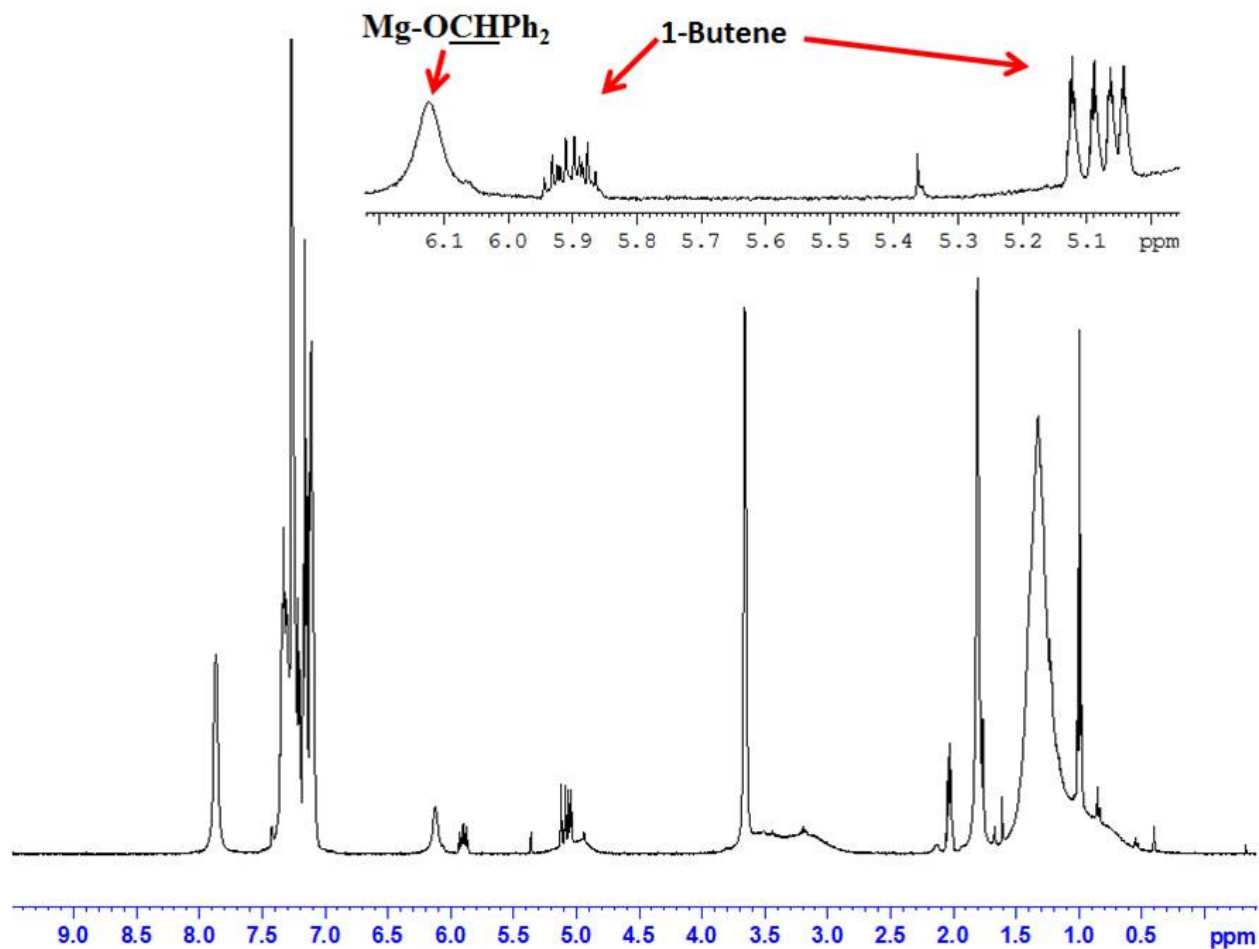

**SI 11:**  $^1\text{H}$  NMR spectrum of the reaction between 1:1 of  $\text{Ph}_2\text{CO}$ :  $\text{L}'\text{MgBu}''(\text{THF})$  in  $\text{C}_6\text{D}_6$  showing the formation of 1-butene and the alkoxide ligand  $\text{OCHPh}_2$ .

# Kinetic Studies of $\epsilon$ -caprolactone (CL) Polymerization using $\text{L}^*\text{MgBu}^n(\text{THF})$ as a catalyst initiator.

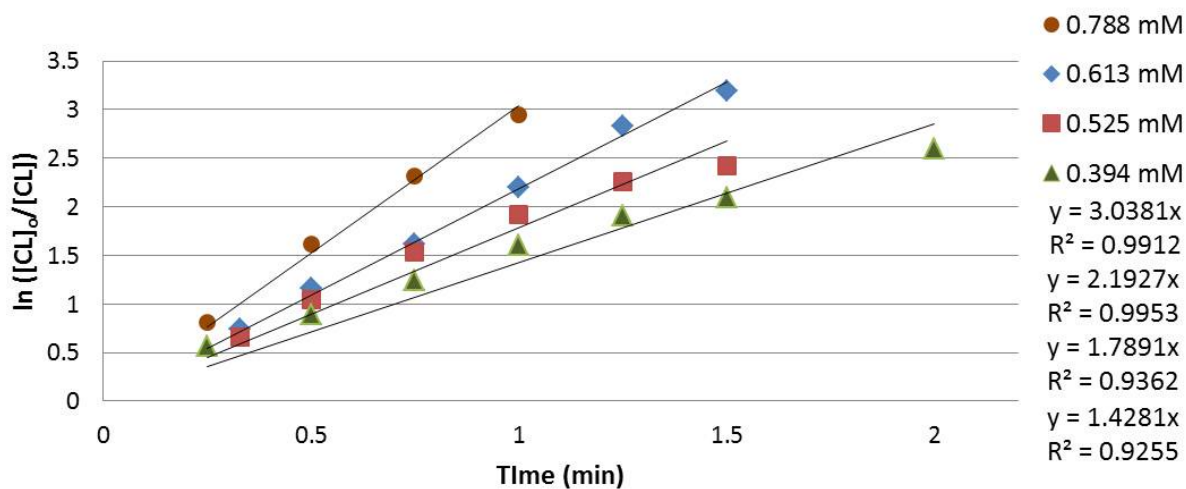

**SI 12:** Semilogarithmic plots of  $\epsilon$ -CL conversion with time in  $\text{CH}_2\text{Cl}_2$  at  $25^\circ\text{C}$  with

$\text{L}^*\text{MgBu}^n(\text{THF})$  as initiator ( $[\text{CL}]_0 = 0.1355 \text{ M}$ , ●;  $[\text{CL}]_0/[\text{cat.}] = 159$ , ◆;  $[\text{CL}]_0/[\text{cat.}] = 204$ , ■;  $[\text{CL}]_0/[\text{cat.}] = 239$ , ▲;  $[\text{CL}]_0/[\text{cat.}] = 318$ )

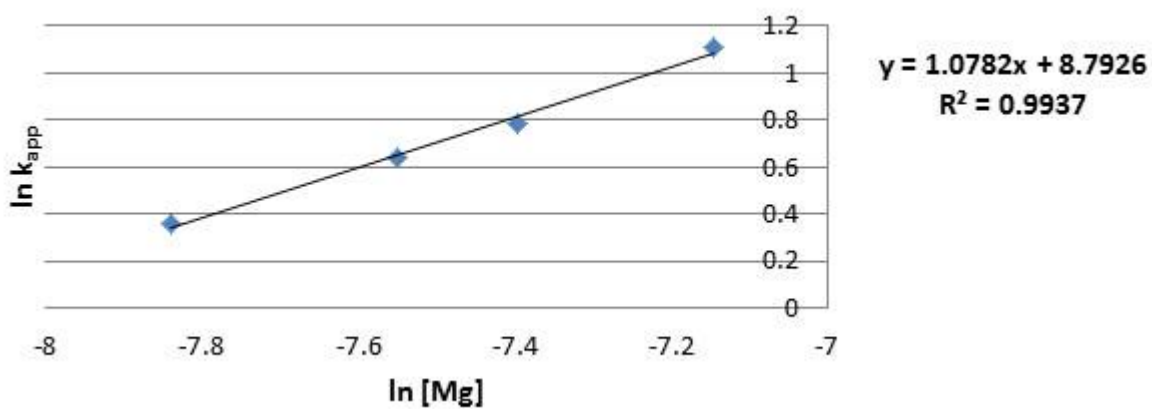

**SI 13:** Plot of  $\ln k_{app}$  versus  $\ln [Mg]$  for the polymerization of CL with  $L^*MgBu^n(THF)$  as initiator ( $CH_2Cl_2$ ,  $25^\circ C$ ,  $[CL]_0 = 0.1355\text{ M}$ ).

| <b>Ratio CL:[Mg]</b> | <b>Time<br/>(second)</b> | <b>%conversion</b> | <b>M<sub>n</sub> (calculation)</b> | <b>M<sub>n</sub>(GPC)<br/>(Dal)</b> | <b>PDI (GPC)</b> |
|----------------------|--------------------------|--------------------|------------------------------------|-------------------------------------|------------------|
| <b>100:1</b>         | 15                       | 98                 | 11,186                             | 18,633                              | 1.61             |
| <b>500:1</b>         | 20                       | 99                 | 56,499                             | 68,354                              | 1.90             |
| <b>1000:1</b>        | 25                       | 98                 | 111,857                            | 100,178                             | 1.87             |
| <b>2000:1</b>        | 35                       | 44                 | 100,443                            | 85,580                              | 1.26             |
| <b>2000:1</b>        | 50                       | 97                 | 221,432                            | 143,056                             | 1.72             |

**SI 14:**  $\epsilon$ -CL ROP; Conditions: catalyst: L'MgBu<sup>n</sup>(THF), solvent; CH<sub>2</sub>Cl<sub>2</sub>, total Volume = 5.0 mL, 25°C

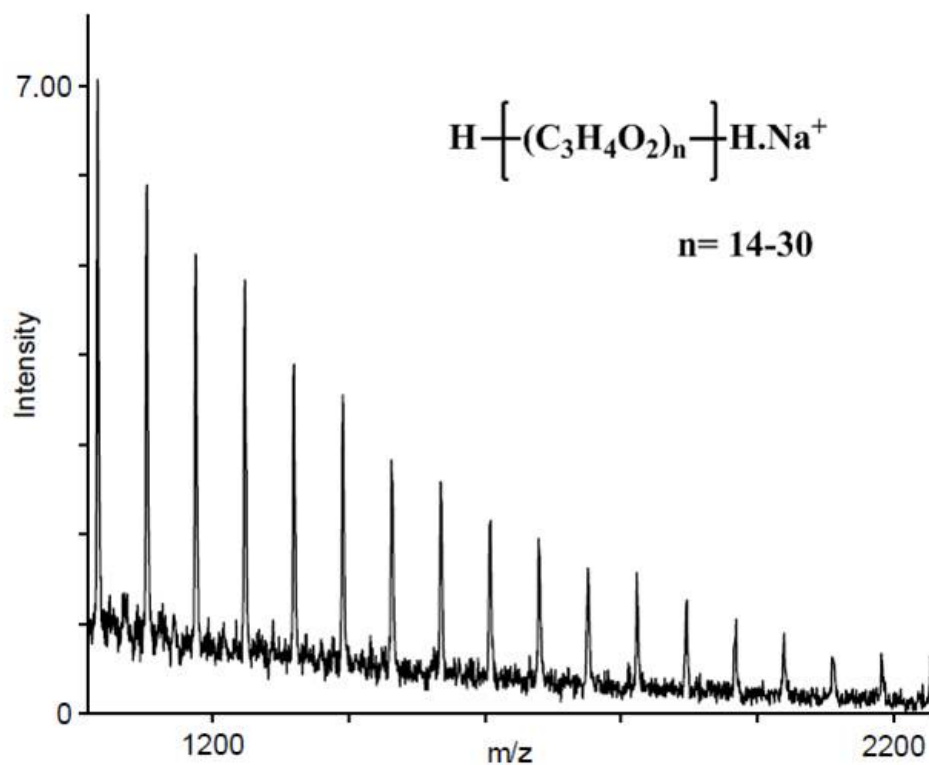

**SI 15:** MALDI-TOF Spectrum: The oligomers of PRLA prepared by  $\text{L}^*\text{MgBu}^n(\text{THF})$  in  $\text{CH}_2\text{Cl}_2$ ,  $25^\circ\text{C}$

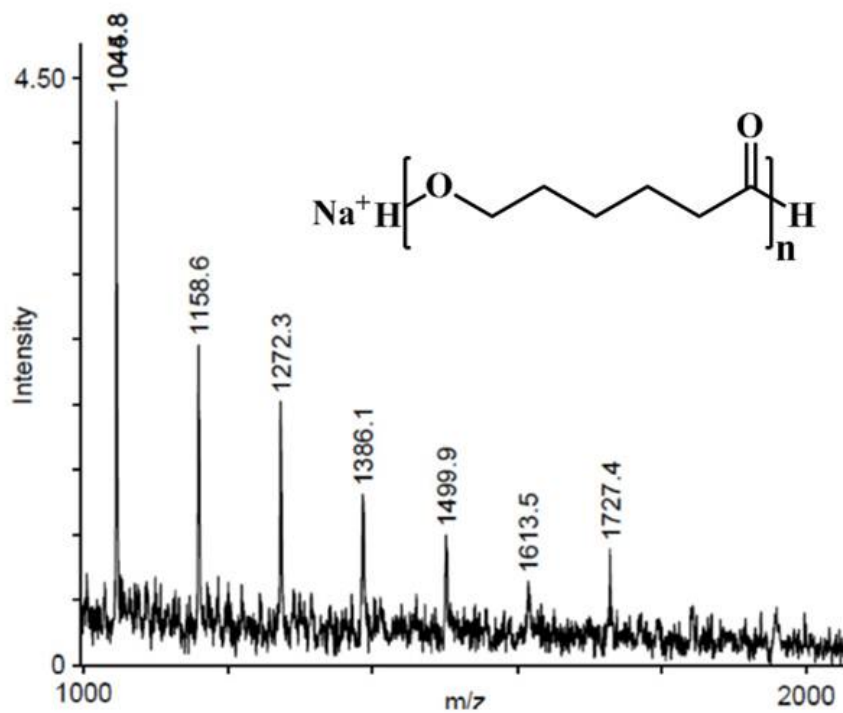

**SI 16:** MALDI-TOF Spectrum; The oligomers of PCL prepared by  $\text{L}^*\text{MgBu}''(\text{THF})$  in  $\text{CH}_2\text{Cl}_2$ ,  $25^\circ\text{C}$

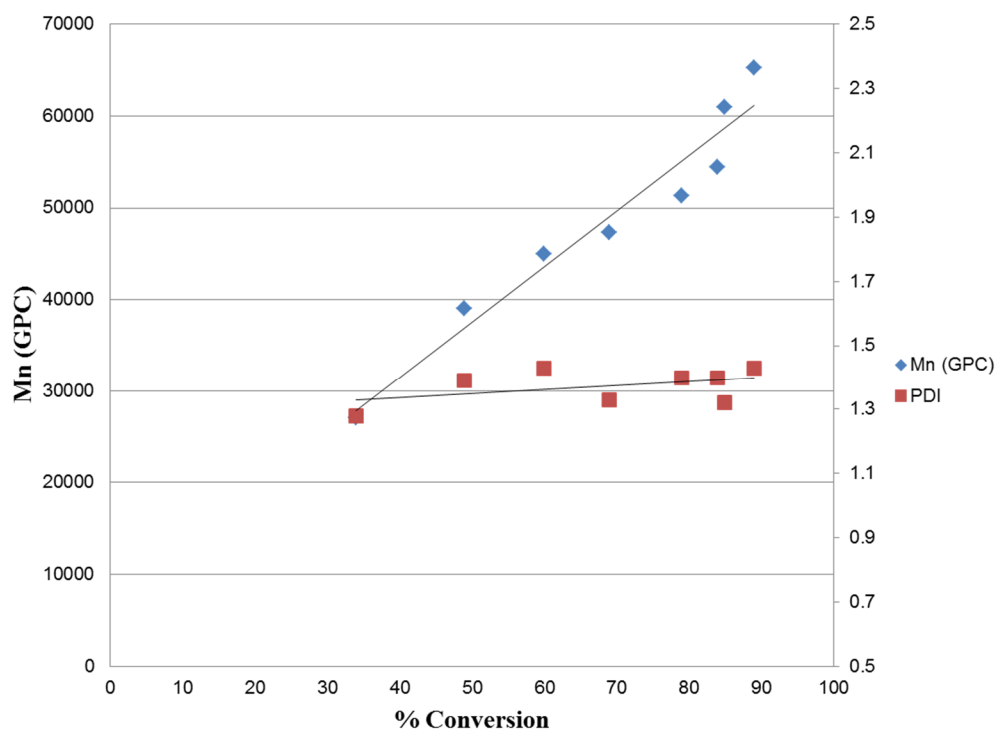

SI 17: Plot of molecular weight ( $M_n$ ) and polydispersity (PDI) vs %conversion for the polymerization of CL using  $\text{LMgBu''(THF)}$  as an initiator. Conditions:  $[\text{CL}]_0 = 0.136 \text{ M}$ ,  $[\text{Mg}] = 0.876 \text{ mM}$ ,  $[\text{CL}]_0/[\text{Mg}] = 155$ ,  $\text{CH}_2\text{Cl}_2$ ,  $25^\circ\text{C}$  (( $\blacklozenge$ )  $M_n$  from GPC; ( $\blacktriangle$ ) polydispersity index (PDI))
